# Supplementary material for: Analysis of interrelated characteristics between ecosystem services and ecosystem health in the Guangdong–Hong Kong–Macao Greater Bay Area
Source: Frontiers journal article supplement (doi:10.3389/fpls.2025.1668073), 2025-09-29
Supplement: Data_Sheet_1.pdf [file Data_Sheet_1.pdf]

## *Supplementary Material*

### 1 Supplementary Tables

**Table 1.** The primary data and their sources

| Data type                                                                       | Data source                                                                                                                                                                                                          | Data description                                                 |
|---------------------------------------------------------------------------------|----------------------------------------------------------------------------------------------------------------------------------------------------------------------------------------------------------------------|------------------------------------------------------------------|
| Land use                                                                        | Yang J et al., 2021 [19]                                                                                                                                                                                             | Five periods in 2000, 2005, 2010, 2015 and 2020; 30 m resolution |
| Digital Elevation Model (DEM)                                                   | Geospatial Data Cloud<br>( <a href="https://www.gscloud.cn">https://www.gscloud.cn</a> )                                                                                                                             | 30m resolution                                                   |
| Meteorological data                                                             | China Meteorological Data Service Centre ( <a href="http://data.cma.cn/en">http://data.cma.cn/en</a> ) and some district and county meteorological bureaus of Guangdong, Hunan, Guangxi, Fujian and Jiangxi Province | Daily scale data of meteorological stations from 2000 to 2020    |
| Absolute depth to bedrock                                                       | International Soil Reference and Information Centre (ISRIC) ( <a href="https://www.isric.org/">https://www.isric.org/</a> )                                                                                          | 250m resolution                                                  |
| Derived available soil water capacity (volumetric fraction) until wilting point | International Soil Reference and Information Centre (ISRIC) ( <a href="https://www.isric.org/">https://www.isric.org/</a> )                                                                                          | 250m resolution                                                  |
| Residential and industrial                                                      | Open Street Map ( <a href="https://www.openstreetmap.org/">https://www.openstreetmap.org/</a> )                                                                                                                      | Shapefile data                                                   |
| Normalized Difference Vegetation Index                                          | Chinese Academy of Science Discipline Data Center for Ecosystem ( <a href="http://www.nesdc.org.cn/">http://www.nesdc.org.cn/</a> ); Zheng et al., 2019 [20]                                                         | Five periods in 2000, 2005, 2010, 2015 and 2020; 30 m resolution |

---

|                          |                                                                                                                              |                                                                   |
|--------------------------|------------------------------------------------------------------------------------------------------------------------------|-------------------------------------------------------------------|
| Net Primary Productivity | Analytical Insight of Earth<br>( <a href="https://engine-aiearth.al.iyun.com/#/">https://engine-aiearth.al.iyun.com/#/</a> ) | Five periods in 2000, 2005, 2010, 2015 and 2020; 500 m resolution |
|--------------------------|------------------------------------------------------------------------------------------------------------------------------|-------------------------------------------------------------------|

---
